# Supplementary material
Source: Research Square preprint supplement (doi:10.21203/rs.3.rs-10243705/v1)
Supplement: Supplementary file 1 [file 708ce0d037b140caf81f3897.docx]

**Appendices**

The appendices contain supplementary technical information. Appendix A details the optical microscope calibration matrices, tracking pixel-to-micrometer ratios under forty-times magnification. Appendix B contains the raw data logs capturing mass fluctuations at zero point five second intervals during the initial sixty seconds of the hybrid neutralization sequence.
